# Supplementary material for: A Molecular Mechanism for Direct Sirtuin Activation by Resveratrol
Source: PubMed Central journal article supplement (PMC3504108; doi:10.1371/journal.pone.0049761), 2012-11-21
Supplement: pone.0049761.s002.pdf [file pone.0049761.s002.pdf]

## Supplementary Figure S2

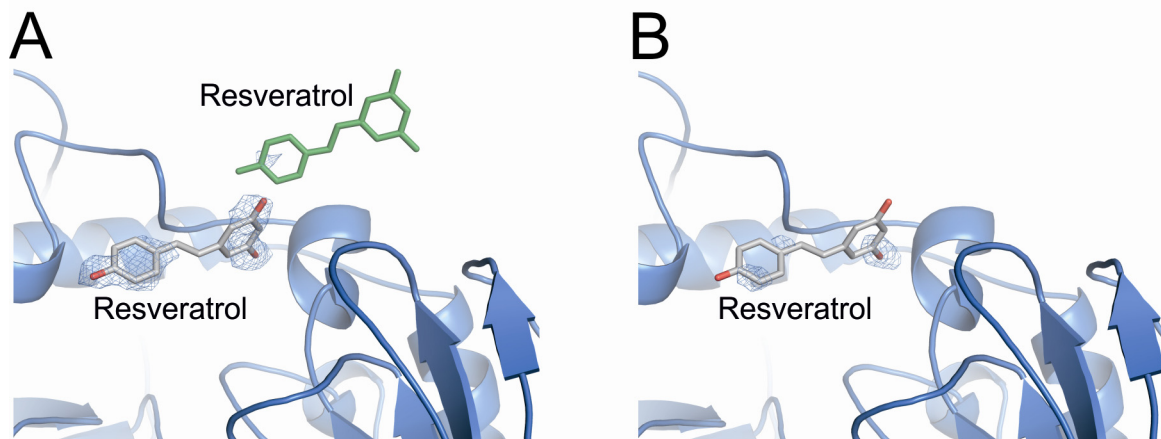

**Supplementary Figure S2: Electron density analysis of properly and randomly placed Sirt5 ligands.** **A** 2Fo-Fc density at  $1.0\sigma$  (blue) defines the resveratrol pose (colored by atom type). For comparison, 2Fo-Fc density for a randomly placed resveratrol molecule (green) is shown at the same  $\sigma$  level. Both resveratrol positions were refined as individual complexes, and ligands and corresponding densities were merged in this figure. **B** 2Fo-Fc omit map ( $0.7\sigma$ ) for resveratrol in the Sirt5/FdL-1/resveratrol complex. The density defines ligand positions only weakly, likely due to low occupancy, as saturating conditions could not be achieved. The structure could be equally well refined into a ligand complex and ligand free Sirt5, indicating a crude estimate of  $\sim 50\%$  for the occupancy for both, peptide and activator. The significance of the developing 2Fo-Fc density for the ligands is documented in panel A and confirms the placement of the ligands based on omit density.
