# Supplementary material for: A Molecular Mechanism for Direct Sirtuin Activation by Resveratrol
Source: PubMed Central journal article supplement (PMC3504108; doi:10.1371/journal.pone.0049761), 2012-11-21
Supplement: pone.0049761.s003.pdf [file pone.0049761.s003.pdf]

### Supplementary Figure S3

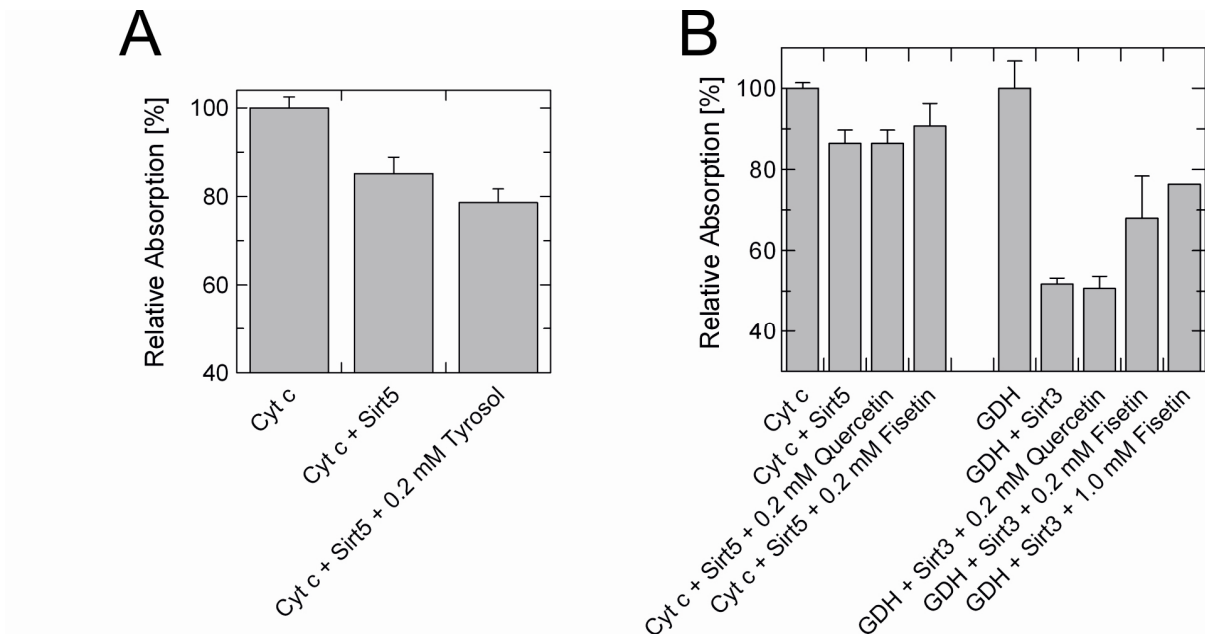

### Supplementary Figure S3 Effects of tyrosol, quercetin, and fisetin on Sirt3 and Sirt5 activity.

**A** Sirt5-dependent deacetylation of Cytochrome c (Cyt c), determined in an ELISA (deacetylation decreases absorbance), can be stimulated by tyrosol. **B** Quercetin does neither affect Sirt5-dependent deacetylation of Cyt c nor Sirt3-dependent deacetylation of glutamate dehydrogenase (GDH) whereas fisetin has a weak inhibitory effect on Sirt5 and significantly inhibits Sirt3. Error bars represent standard deviations.
