# Supplementary material for: A Molecular Mechanism for Direct Sirtuin Activation by Resveratrol
Source: PLoS One. 2012 Nov 21;7(11):e49761. doi: 10.1371/journal.pone.0049761 (PMC3504108; doi:10.1371/journal.pone.0049761)
Supplement: Table S1 — (PDF) [file pone.0049761.s004.pdf]

**Table S1: Chemical structures of the compounds studied and their effects on recombinant human Sirt3 and Sirt5**

| Compound    | Chemical structure                                                                  | Effect on Sirt3 activity |            | Effect on Sirt5 activity |                 |                                                                      |
|-------------|-------------------------------------------------------------------------------------|--------------------------|------------|--------------------------|-----------------|----------------------------------------------------------------------|
|             |                                                                                     | FdL assay                | ELISA      | FdL assay                | ELISA           | Mass spectrometry                                                    |
| Resveratrol | 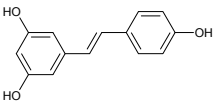   | inhibition               | inhibition | activation               | activation      | activation (Prx1 peptide and protein)<br><br>no effect (p53 peptide) |
| Piceatannol | 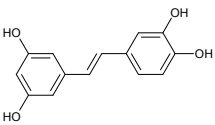   | inhibition               | n.d.       | activation               | activation      | activation (Prx1 peptide)                                            |
| Tyrosol     | 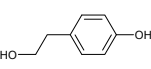 | n.d.                     | n.d.       | n.d.                     | weak activation | n.d.                                                                 |
| Quercetin   | 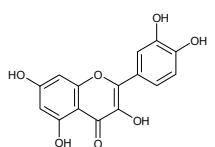 | n.d.                     | no effect  | n.d.                     | no effect .     | n.d.                                                                 |
| Fisetin     | 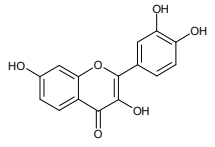 | n.d.                     | inhibition | n.d.                     | weak inhibition | n.d.                                                                 |

n.d.: not determined
